# Supplementary material for: Atomic resolution dynamics of cohesive interactions in phase-separated Nup98 FG domains
Source: PubMed Central journal article supplement (PMC8938434; doi:10.1038/s41467-022-28821-8), 2022-03-21
Supplement: 41467_2022_28821_MOESM3_ESM.pdf [file 41467_2022_28821_MOESM3_ESM.pdf]

### **Description of additional supplementary data files**

Supplementary Software : The Jupyter notebook (software) for fitting TRACT data.
